# Supplementary figures and images for: YB-1 Is Altered in Pregnancy-Associated Disorders and Affects Trophoblast in Vitro Properties via Alternation of Multiple Molecular Traits
Source: MDPI journal article supplement (doi:10.3390/ijms22137226), 2021-07-05

A

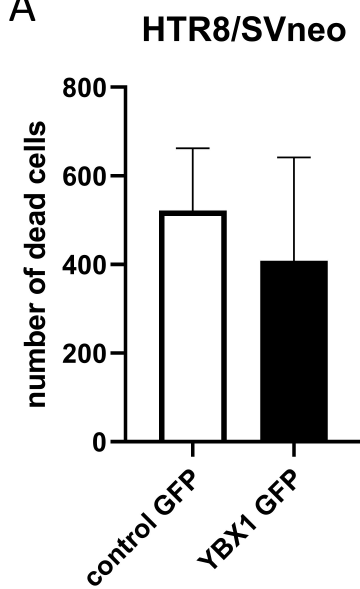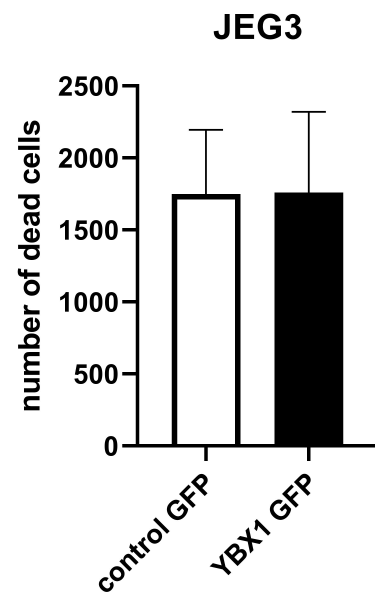

B

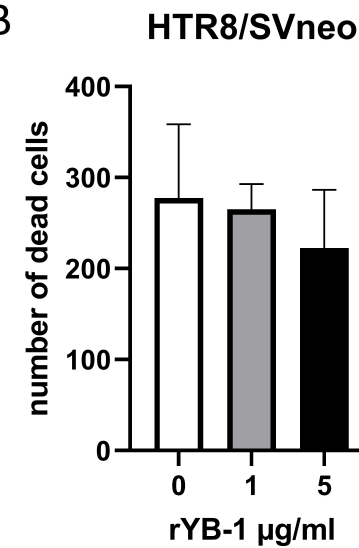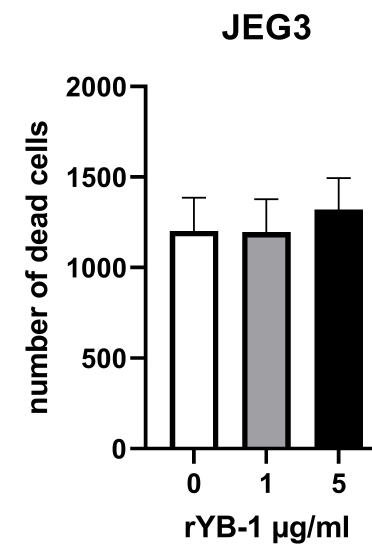

Supplement: s1 [file s1]
